# Supplementary material for: Upgrading Waste Activated Carbon by Equipping Micro-/Mesopore-Dominant Microstructures from the Perspective of Circular Economy
Source: MDPI journal article supplement (doi:10.3390/pr10081631), 2022-08-17
Supplement: s1 [file s1]

Archive with 1 entries (1 files):
- processes-1868737-supplementary.pdf
